# Supplementary material for: Silicon Era of Carbon-Based Life: Application of Genomics and Bioinformatics in Crop Stress Research
Source: PubMed Central journal article supplement (PMC3709742; doi:10.3390/ijms140611444), 2013-05-29
Supplement: ijms-14-11444-s001.pdf [file ijms-14-11444-s001.pdf]

## Supplementary Information

**Table S1.** Crops with reduced genetic diversity proven by whole genome sequencing studies.

| Crop           | Materials                                                                                                                                                                                                       | Methods                                                                                                                                                     | Genetic diversity indicators                            | Values                                                                                                               | Reference |
|----------------|-----------------------------------------------------------------------------------------------------------------------------------------------------------------------------------------------------------------|-------------------------------------------------------------------------------------------------------------------------------------------------------------|---------------------------------------------------------|----------------------------------------------------------------------------------------------------------------------|-----------|
| <b>Barley</b>  | Barley cultivar (cv.) Morex (as <i>de novo</i> reference) 4 Barley cultivars (“Bowman”, “Barke, Igri” and “Haruna Nijo”) 1 <i>Hordeum vulgare</i> ssp. <i>spontaneum</i> (wild progenitor of cultivated barley) | Mapping sequence reads of 4 barley cultivars and <i>H. spontaneum</i> accession to the Morex reference genome to identify single nucleotide variation (SNV) | Single nucleotide variation compared with the reference | Bowman: 3,112,520<br>Barke: 3,651,330<br>Haruna Nijao: 948,722<br>Igri: 3,257,946<br><i>H. spontaneum</i> : 6,191,10 | [19]      |
| <b>Maize</b>   | 35 improved maize lines 23 traditional landraces 17 wild relatives (14 <i>parviglumis</i> ; 2 <i>Zea mays</i> ssp. <i>Mexicana</i> , 1 <i>Tripsacum dactyloides</i> var. <i>meridionale</i> )                   | Mapping of re-sequencing read to the maize reference genome (release 4a.53)                                                                                 | LOWESS curves of nucleotide diversity ( $\pi$ )         |                                                                                                                      | [42]      |
| <b>Rice</b>    | 40 cultivated rice accessions ( <i>Oryza sativa</i> ) 10 wild progenitors ( <i>Oryza rufipogon</i> and <i>Oryza nivara</i> )                                                                                    | Mapping of re-sequencing reads to IRGSP v4 rice genome                                                                                                      | $\pi$ per kb $\theta_w$ per kb                          | Cultivated rice: 5.4<br>Wilde rice: 7.7<br>Cultivated rice: 6.6<br>Wilde rice: 11.5                                  | [41]      |
| <b>Soybean</b> | 17 wild soybeans 14 cultivated soybeans                                                                                                                                                                         | Mapping re-sequencing reads of the 31 accessions to the Williams 82 reference genome                                                                        | Whole genome $\theta_\pi$ values                        | Cultivated: $1.89 \times 10^{-3}$<br>Wild: $2.97 \times 10^{-3}$                                                     | [40]      |

**Table S2.** Recent genome-wide identification of gene families.

| Species                | Gene family                        | No. of gene | Search strategy     | Tools/databases                                             | Reference |
|------------------------|------------------------------------|-------------|---------------------|-------------------------------------------------------------|-----------|
| Viridiplantae          | Annexin Superfamily                | 149 *       | Keyword             | SUPERFAMILY database; Plaza database; Phytozome database    | [238]     |
| <i>Cucumis sativus</i> | NBS-encoding genes                 | 57          | Pattern             | TBLASTN; BLASTN; FGENESH; GENSCAN                           | [239]     |
|                        | ERF                                | 103         | Pattern             | TBLASTN; Pfam; SMART                                        | [240]     |
|                        | R2R3MYB family                     | 55          | Pattern             | BLASTP; Pfam; SMART                                         | [241]     |
|                        | WRKY                               | 55          | Pattern             | BLASTP; HMMER; Pfam                                         | [242]     |
| <i>Glycine max</i>     | NB-LRR                             | 319         | Pfam ID             |                                                             | [243]     |
|                        | MYB                                | 244         | Pattern             | BLASTN; BLASTP; SMART;                                      | [244]     |
|                        | NAC                                | 152         | Other               | SoyDB; PlantTFDB; TMHMM                                     | [245]     |
|                        | trihelix-GT                        | 63          | Pattern             | BLASTP; SMART; MEME; TBLASTN                                | [246]     |
|                        | bHLH                               | 45          | Pattern             | BLASTP; SMART; MEME; TBLASTN                                | [246]     |
|                        | NAC                                | 31          | Pattern             | TBLASTN                                                     | [247]     |
|                        | WRKY                               | 58          | Pattern             | BLAST                                                       | [248]     |
| <i>Malus domestica</i> | Dehydrin                           | 12          | Pattern             | Pfam; HMMER                                                 | [249]     |
|                        | DREB                               | 68          | Pattern             | BLASTP; Pfam; SMART                                         | [250]     |
| <i>Oryza sativa</i>    | HD-Zip                             | 30          | Pattern             | BLAST; GENSCAN                                              | [251]     |
|                        | C2H2 zinc finger                   | 189         | Keyword and Pattern | HMMER; PROSITE; INTERPRO                                    | [252]     |
|                        | HAK Potassium transporter gene     | 26          | Pattern             | BLAST; GENSCAN; GenomeScan; FGENESH; GeneMark.hmm; GrailEXP | [253]     |
|                        | SOT family                         | 35          | Pattern             | BLAST; SMART; Pfam                                          | [254]     |
|                        | BURP domain-containing genes       | 17          | Pattern             | BLAST; Pfam; SMART                                          | [255]     |
|                        | FKBP                               | 29          | Keyword and Pattern | TBLASTN                                                     | [256]     |
|                        | Ankyrin repeat containing proteins | 158         | Pattern             | BLASTP; TBLASTN; Pfam; hmmer                                | [257]     |
| <i>Oryza sativa</i>    | Homeobox                           | 107         | Pattern             | Pfam; SMART; TIGR; BLAST                                    | [258]     |
|                        | Ribosome-inactivating proteins     | 31          | Keyword and Pattern | TBLASTN; BLASTP; Pfam                                       | [259]     |
|                        | NAC                                | 151         | Keyword and Pattern | BLASTP; TBLASTN; Pfam; SMART                                | [260]     |
|                        | Thioredoxin gene                   | 61          | Other               | HomoloGene                                                  | [261]     |
|                        | Hsp20                              | 39          | Pattern             | Pfam; BlastP; SMART                                         | [262]     |
|                        | AP2/EREBP                          | 163         | Keyword and Pattern | BLASTP; TBLASTN; SMART; Pfam                                | [87]      |
|                        | Receptor-like cytoplasmic kinase   | 379         | Pattern             | HMMER; SMART; InterProScan; TMMH2; KOME                     | [263]     |
|                        | CCCH-type zinc finger              | 67          | Pattern             | SMART; Pfam; BLASTP; TBLASTN                                | [264]     |
|                        | Amino acid transporter             | 85          | Keyword and Pattern | BLASTP; Pfam; InterProScan                                  | [265]     |

Table S2. Cont.

| Species                     | Gene family                         | No. of gene | Search strategy                       | Tools/databases                                 | Reference |
|-----------------------------|-------------------------------------|-------------|---------------------------------------|-------------------------------------------------|-----------|
| <i>Solanaceae sp.</i>       | Aux/IAA gene                        | 26 + 27     | Keyword and Pattern                   | TBLASTN; DNASTAR; FGENSESH                      | [266]     |
| <i>Solanum lycopersicum</i> | Dicer-like                          | 7           | Pattern                               | Pfam; HMMER; BLAST                              | [267]     |
|                             | Argonaute                           | 15          | Pattern                               | Pfam; HMMER; BLAST                              | [267]     |
|                             | RNA-dependent RNA polymerase        | 6           | Pattern                               | Pfam; HMMER; BLAST                              | [267]     |
|                             | WRKY                                | 81          | Pattern                               | Pfam; HMMER; SMART                              | [268]     |
|                             | MAP Kinase                          | 16          | Pattern                               | SOL Genomics Network; tomato plant GDB database | [269]     |
| <i>Sorghum vulgare</i>      | BURP domain-containing genes        | 11          | Pattern                               | Pfam; SMART: BLASTP                             | [270]     |
| <i>Vitis vinifera</i>       | Stilbene synthase multigenic family | 48          | Pattern                               | BLAST; GAZE; JIGSAW; Genoscope                  | [271]     |
|                             | AP2/ERF                             | 132         | Pattern                               | BLASTP; PSI-BLAST                               | [272]     |
| <i>Zea mays</i>             | NBS-encoding gene                   | 109         | Pattern                               | Pfam; DNATOOLS; SMART                           | [273]     |
|                             | BURP domain-containing genes        | 15          | Pattern                               | Pfam; SMART: BLASTP                             | [270]     |
|                             | beta-glucosidase                    | 26          | Pattern                               | BLAST                                           | [274]     |
|                             | Heat shock transcription factor     | 25          | Pattern                               | BLASTP; Pfam; SMART                             | [275]     |
|                             | CCCH-type zinc finger               | 68          | Pattern                               | BLASTP; DNATOOLS software; Pfam; SMART          | [276]     |
|                             | immunophilin FKBP                   | 30          | Keyword and Pattern                   | BLASTP; Pfam                                    | [277]     |
|                             | WRKY                                | 119         | Pattern                               | BLASTP                                          | [278]     |
|                             | HAK potassium transporter gene      | 27          | Pattern                               | BLASTP                                          | [279]     |
|                             | Galactinol synthase                 | 53          | Pattern                               | MaizeGDB; Maize Sequence Search; Pfam           | [280]     |
|                             | RS and stachyose synthase           | 10          | Pattern                               | MaizeGDB; Maize Sequence Search; Pfam           | [280]     |
| alpha-galactosidase         | 5                                   | Pattern     | MaizeGDB; Maize Sequence Search; Pfam | [280]                                           |           |
| beta-fructofuranosidase     | 11                                  | Pattern     | MaizeGDB; Maize Sequence Search; Pfam | [280]                                           |           |

\* Total number of genes identified from multiple Viridiplantae species.

**Table S3.** Proteomics studies related to crop stresses reported in 2012.

| Species   | Stress                           | Analysis methods                                                                                                                        | Reference |
|-----------|----------------------------------|-----------------------------------------------------------------------------------------------------------------------------------------|-----------|
| Barley    | Drought                          | 2D DIGE + MALDI-TOF MS                                                                                                                  | [281]     |
|           | Salt                             | 2D PAGE + MALDI-TOF-TOF MS                                                                                                              | [282]     |
| Canola    | <i>Pseudomonas putida</i> + Salt | 2D DIGE + Q-TOF, LC-MS/MS                                                                                                               | [283]     |
| Carrot    | <i>Mycocentrospora acerina</i>   | 2D PAGE + MALDI-TOF-TOF MS                                                                                                              | [284]     |
| Cotton    | Drought                          | 2D PAGE + MALDI-TOF-TOF MS                                                                                                              | [285]     |
|           | Low temperature                  | 2D PAGE + MALDI-TOF MS, MALDI-TOF-TOF MS                                                                                                | [286]     |
|           | Nitrogen stress                  | 2D PAGE + MALDI-TOF MS, MALDI-TOF-TOF MS                                                                                                | [287]     |
| Cucumber  | Hypoxic stress                   | 2D PAGE + MALDI-TOF MS, MALDI-TOF-TOF MS                                                                                                | [288]     |
| Grapevine | Downy mildew                     | Eight-plex + LC-MS/MS                                                                                                                   | [289]     |
|           | GA3                              | 2D PAGE + MALDI-TOF MS, MALDI-TOF-TOF MS                                                                                                | [290]     |
| Kiwifruit | Ozone                            | SDS PAGE + LC-MS/MS                                                                                                                     | [291]     |
| Maize     | Desiccation                      | 2D PAGE + MALDI-TOF-TOF MS                                                                                                              | [292]     |
|           | Drought                          | iTRAQ + LC-MALDI                                                                                                                        | [293]     |
|           | Low light                        | SDS PAGE (ProQ Diamond staining for phosphoprotein or Western blot with antibody against phosphothreonine) LC-MS/MS, thylakoid proteins | [294]     |
| Mungbean  | Cd-induced oxidative stress      | 2D PAGE + LC-MS/MS                                                                                                                      | [295]     |
| Papaya    | Papaya meleira virus             | SDS PAGE + LC-MS/MS                                                                                                                     | [296]     |
| Rapeseed  | Drought                          | 2D PAGE + LTQ XL Orbitrap MS/MS                                                                                                         | [297]     |
|           | Methyl Jasmonate                 | eight-plex + QSTAR, LC-TOF/TOF, LC-TripleTOF                                                                                            | [298]     |

Table S3. Cont.

| Species | Stress                                     | Analysis methods                                                      | Reference |
|---------|--------------------------------------------|-----------------------------------------------------------------------|-----------|
| Rice    | Cold                                       | 2D PAGE (ProQ diamond staining for phosphoprotein) + MALDI-TOF-TOF MS | [299]     |
|         | Drought                                    | 2D PAGE + MALDI-TOF MS                                                | [300]     |
|         | Drought                                    | 2D PAGE + LTQ-XL Orbitrap MS                                          | [301]     |
|         | <i>Magnaporthe oryza</i>                   | 2D PAGE + MALDI-TOF MS                                                | [302]     |
|         | <i>Magnaporthe oryza</i>                   | 2D PAGE + MALDI-MS/MS                                                 | [303]     |
|         | Nitrogen stress                            | 2D PAGE + MALDI-TOF MS                                                | [304]     |
|         | Ozone                                      | 2D PAGE + LTQ XL Orbitrap MS                                          | [305]     |
|         | Selenium                                   | 2D PAGE + MALDI-TOF-TOF MS                                            | [306]     |
|         | <i>Xanthomonas campestris pv. Oryicola</i> | 2D PAGE + MALDI-TOF-MS                                                | [307]     |
| Sorghum | Salt                                       | 2D PAGE + MALDI-TOF-TOF MS                                            | [308]     |
| Soybean | Cadmium stress                             | Microsomal proteins 2D PAGE + LTQ XL Orbitrap MS                      | [125]     |
|         | Cadmium stress                             | 2D PAGE + LTQ XL Orbitrap MS                                          | [309]     |
|         | Drought                                    | 2D PAGE + LTQ XL Orbitrap MS                                          | [310]     |
|         | Flooding                                   | 2D PAGE + MALDI-TOF MS, LTQ XL Orbitrap MS                            | [311]     |
|         | Flooding                                   | Proteolysis proteomics 2D PAGE + LTQ XL Orbitrap MS                   | [312]     |
|         | Flooding + <i>Bradyrhizobium japonicum</i> | 2D PAGE + MALDI TOF MS/NanoLC MS/MS                                   | [313]     |
|         | High temperature and humidity              | 2D PAGE + MALDI-TOF                                                   | [314]     |
|         | Ozone                                      | Thio-labeling for redox proteome 2D + LC-MS/MS                        | [127]     |

Table S3. Cont.

| Species    | Stress                          | Analysis methods                                         | Reference |
|------------|---------------------------------|----------------------------------------------------------|-----------|
| Soybean    | <i>Phakopora pachyrhizi</i>     | 2D PAGE + MALDI-TOF/TO                                   | [315]     |
|            | Salt                            | 2D PAGE + MALDI-TOF-TOF MS                               | [316]     |
|            | Flooding                        | 2D PAGE + LTQ XL Orbitrap MS                             | [317]     |
|            | Flooding                        | Total protein or enriched phosphoprotein LTQ XL Orbitrap | [318]     |
|            | Flooding or low oxygen          | 2D PAGE + MALDI TOF MS/NanoLC MS/MS                      | [319]     |
| Strawberry | Cold                            | 2D PAGE + LC-MS/MS                                       | [320]     |
|            | <i>Colletorichum fragariae</i>  | 2D PAGE + MALDI-TOF-TOF MS/MS                            | [321]     |
| Sugarcane  | Osmotic stress                  | 2D PAGE + MALDI-TOF-MS                                   | [322]     |
| Tomato     | <i>Botrytis cinerea</i>         | 2D PAGE + LC-MS/MS                                       | [323]     |
| Wheat      | Drought                         | 2D PAGE + MALDI-TOF MS, MALDI-TOF-TOF MS                 | [324]     |
|            | Drought                         | 2D PAGE + MALDI TOF/TOF MS                               | [325]     |
|            | Frost                           | 2D PAGE + MALDI-TOF MS, MALDI-TOF-TOF MS                 | [326]     |
|            | <i>Fusarium graminearum</i>     | 2D PAGE + LC-LTQ-Qrbitrap                                | [327]     |
|            | <i>Fusarium verticillioides</i> | SDS PAGE + LC-MS/MS                                      | [328]     |
|            | Salt                            | 2D PAGE + LTQ-FTICR-MS Chloroplastic proteins            | [124]     |
|            | Salt                            | 2D PAGE + MALDI TOF/TOF MS                               | [329]     |
